# Supplementary material
Source: publisher figshare collection journal article supplement (https://acs.figshare.com/ndownloader/files/17566787)
Supplement: Supplementary file 1 [file 17566787]

**Supplementary Information for:**

**Soluble Regions of GlpG Influence Protein-Lipid Interactions and Lipid Distribution**

Yasser Almeida-Hernandez<sup>1,2\*</sup> and Henning Tidow<sup>1,2\*</sup>

<sup>1</sup> Department of Chemistry, Institute for Biochemistry and Molecular Biology, University of Hamburg, Martin-Luther-King-Platz 6, D-20146 Hamburg, Germany

<sup>2</sup> The Hamburg Centre for Ultrafast Imaging, University of Hamburg, Luruper Chaussee 149, D-22761 Hamburg, Germany

\* Corresponding authors:

Henning Tidow

Department of Chemistry, Institute for Biochemistry and Molecular Biology, University of Hamburg, Martin-Luther-King-Platz 6, D-20146 Hamburg, Germany

Tel: +49 40428388984

e-mail: [tidow@chemie.uni-hamburg.de](mailto:tidow@chemie.uni-hamburg.de)

Yasser Almeida-Hernandez

Department of Chemistry, Institute for Biochemistry and Molecular Biology, University of Hamburg, Martin-Luther-King-Platz 6, D-20146 Hamburg, Germany

e-mail: [yasser.almeida.hernandez@chemie.uni-hamburg.de](mailto:yasser.almeida.hernandez@chemie.uni-hamburg.de)

Figure S1

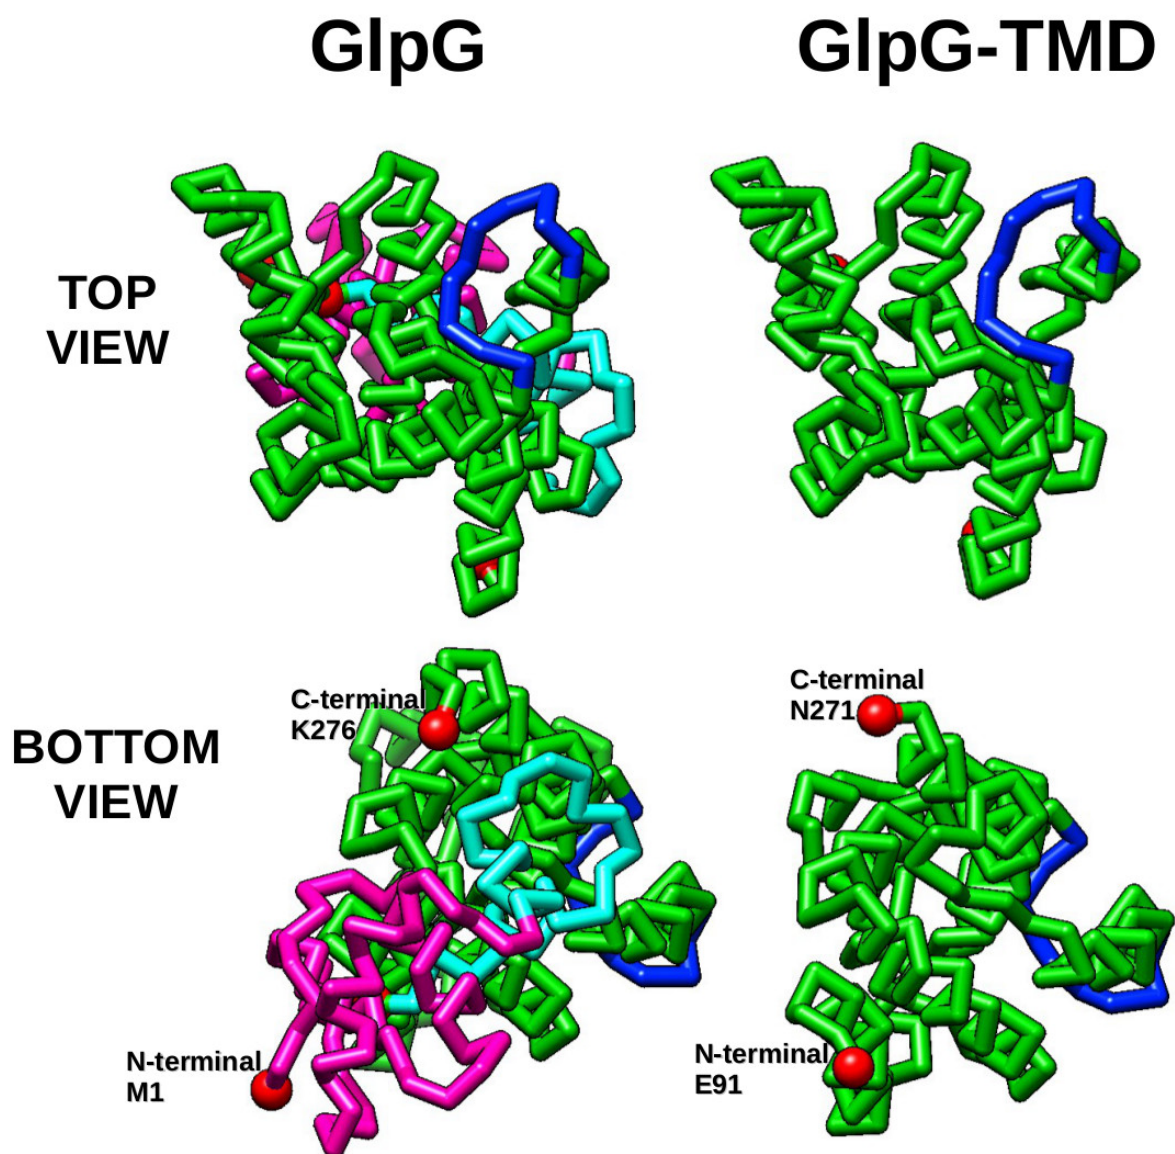

**Top and bottom views of GlpG and GlpG-TMD.** Magenta: CytoD, Cyan: Ln region, Green: TMD, Blue: L5 loop. These orientations have been used for the structural alignment in the 2D density maps (Figures 3, S2).

Figure S2

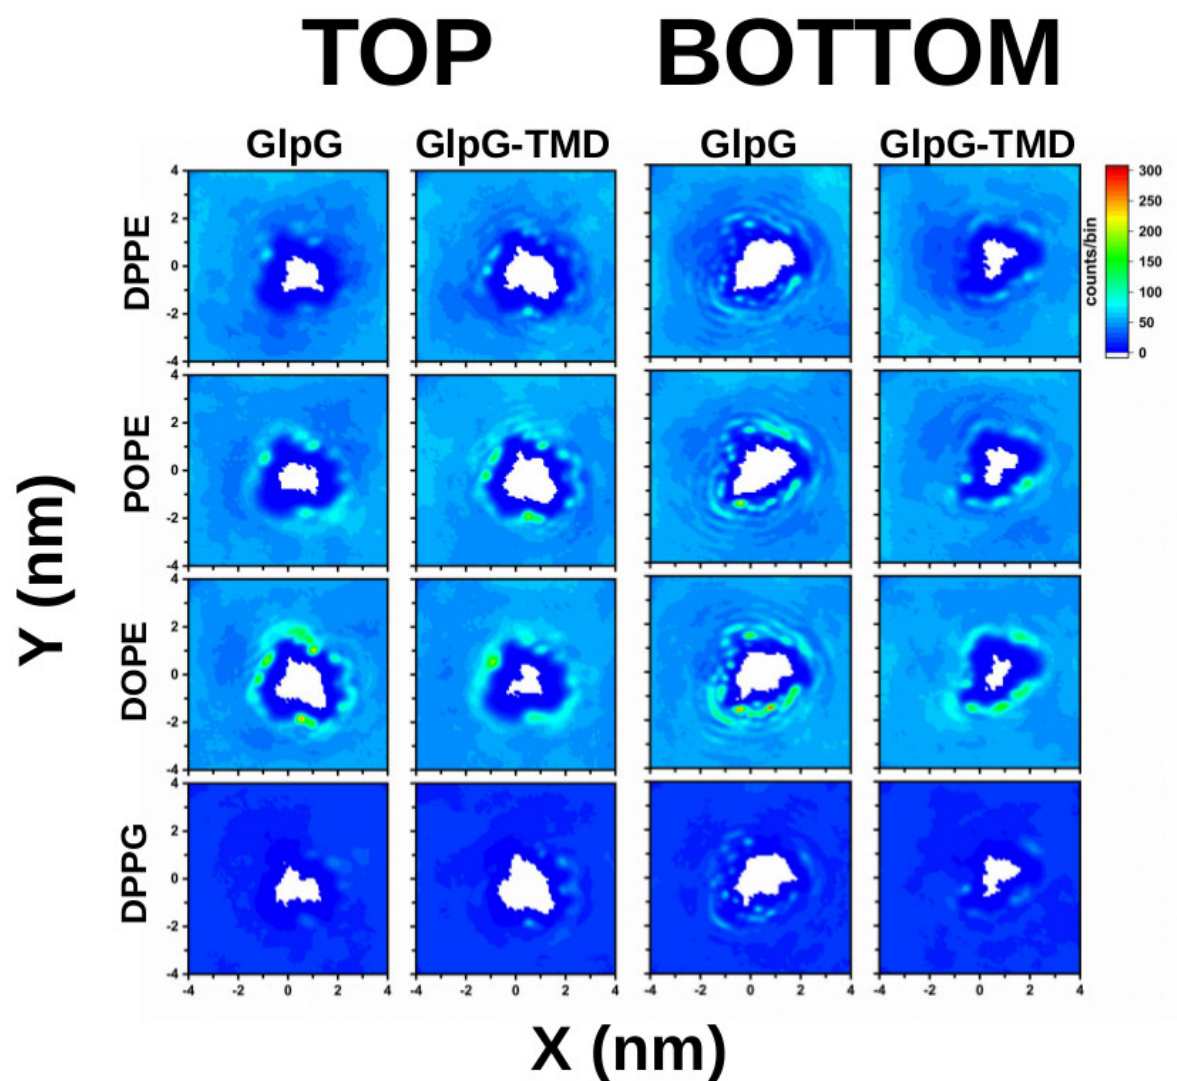

Averaged density maps of PE-based lipids and DPPG in the top and bottom leaflet for GlpG and GlpG-TMD.

**Figure S3**

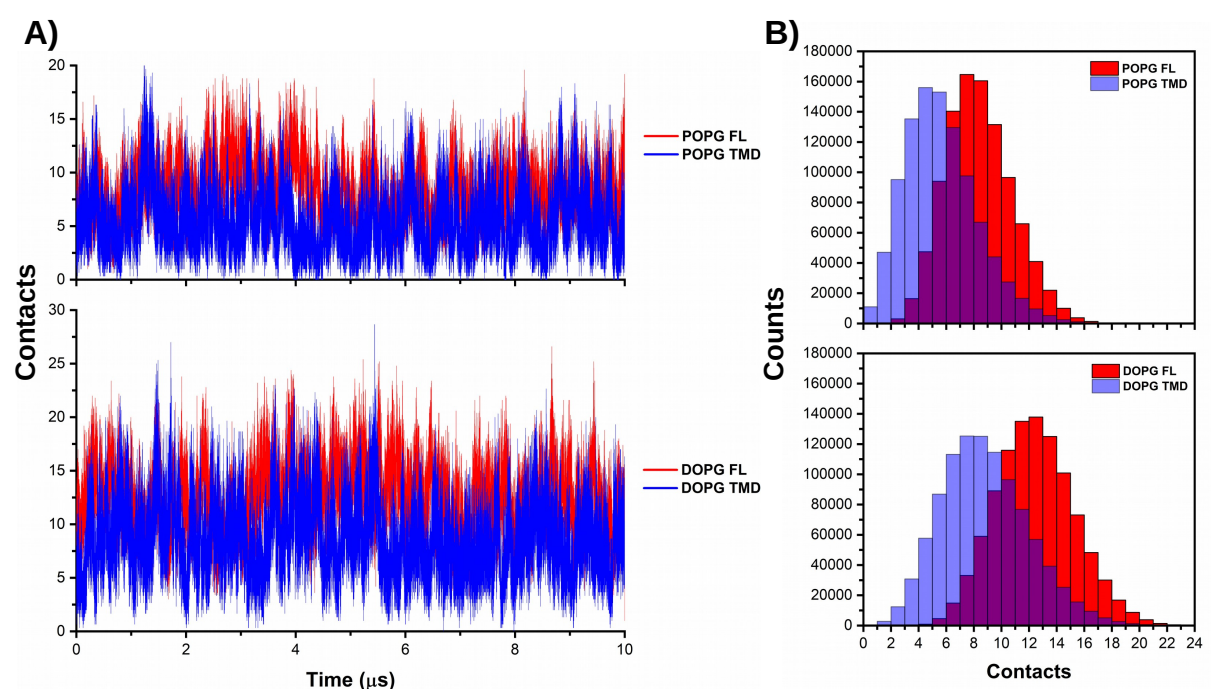

**A) Averaged total number of contacts (both leaflets) of POPG and DOPG with GlpG and GlpG-TMD, along entire simulations. B) Distribution of the contacts along entire simulations.**
